# Supplementary material for: Cobalt nanoparticles embedded in N-doped carbon as an efficient bifunctional electrocatalyst for oxygen reduction and evolution reactions
Source: Royal Society of Chemistry journal article supplement (doi:10.1039/c4nr04357j), 2014-01-01
Supplement: c4nr04357j1.pdf [file c4nr04357j1.pdf]

## Supporting Information

### **Cobalt nanoparticles embedded in N-doped carbon as an efficient bifunctional electrocatalyst for oxygen reduction and evolution reactions**

Yunhe Su, Yihua Zhu,\* Hongliang Jiang, Jianhua Shen, Xiaoling Yang, Wenjian Zou, Jianding Chen,\*  
and Chunzhong Li

Key Laboratory for Ultrafine Materials of Ministry of Education, School of Materials Science and Engineering, East China University of Science and Technology, Shanghai, 200237, P. R. China.

E-mail: yhzhu@ecust.edu.cn (Prof. Y. H. Zhu), Fax: +86 21 64250624

Email: jiandingchen@ecust.edu.cn (Prof. J. D. Chen)

\*Author(s) to whom correspondence should be addressed.

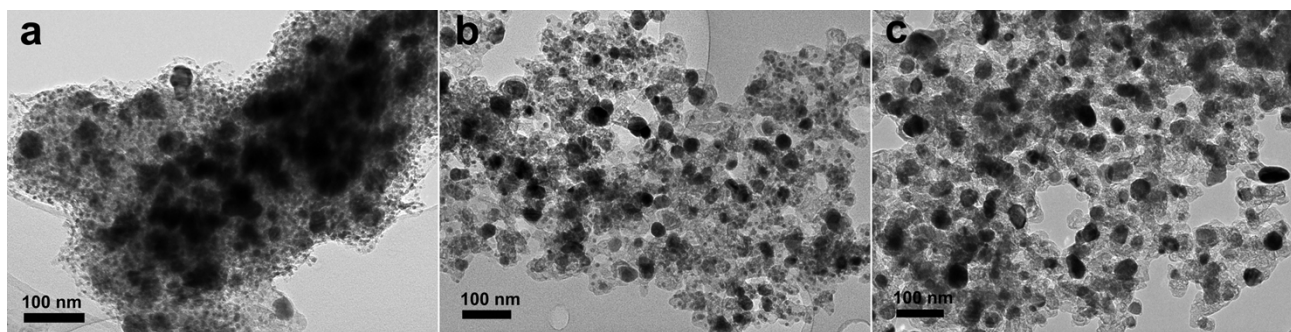

**Figure S1.** TEM images of (a) Co/N-C-700, (b) Co/N-C-800, and (c) Co/N-C-900.

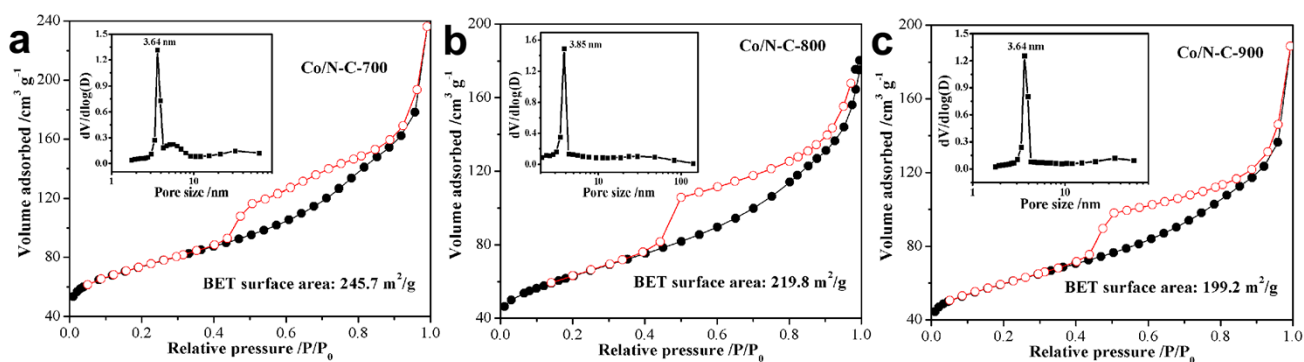

**Figure S2.** Nitrogen adsorption and desorption isotherms of (a) Co/N-C-700, (b) Co/N-C-800, and (c) Co/N-C-900, the insets show the corresponding BJH pore distributions.

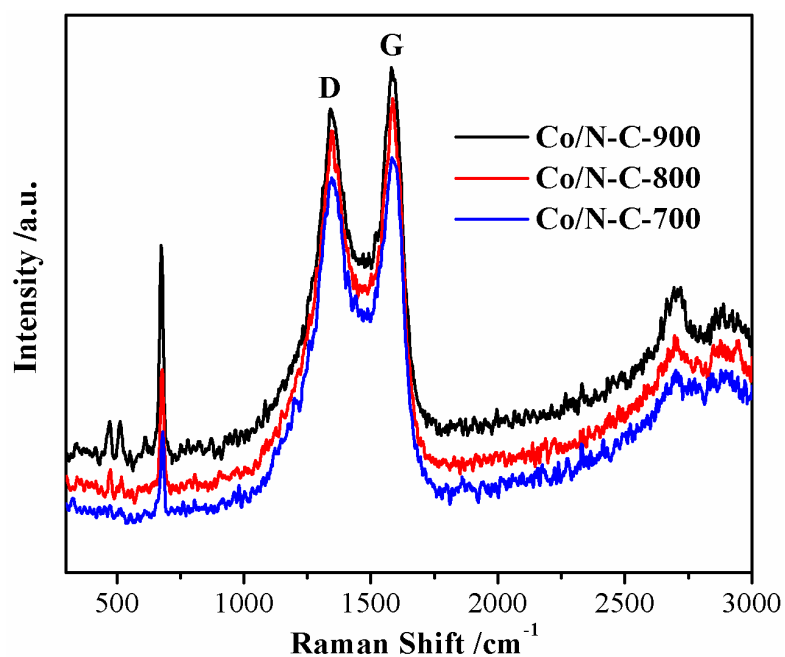

Figure S3. Raman spectra for Co/N-C samples carbonized under different temperatures.

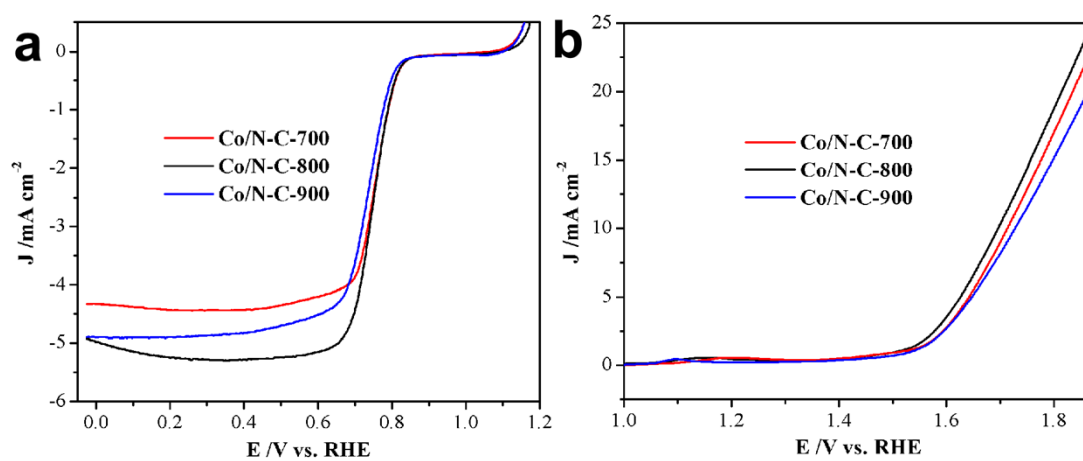

Figure S4. (a) ORR and (b) OER linear sweep voltammograms at 1600 rpm for Co/N-C samples carbonized under different temperatures in  $O_2$ -saturated 0.1 M KOH.

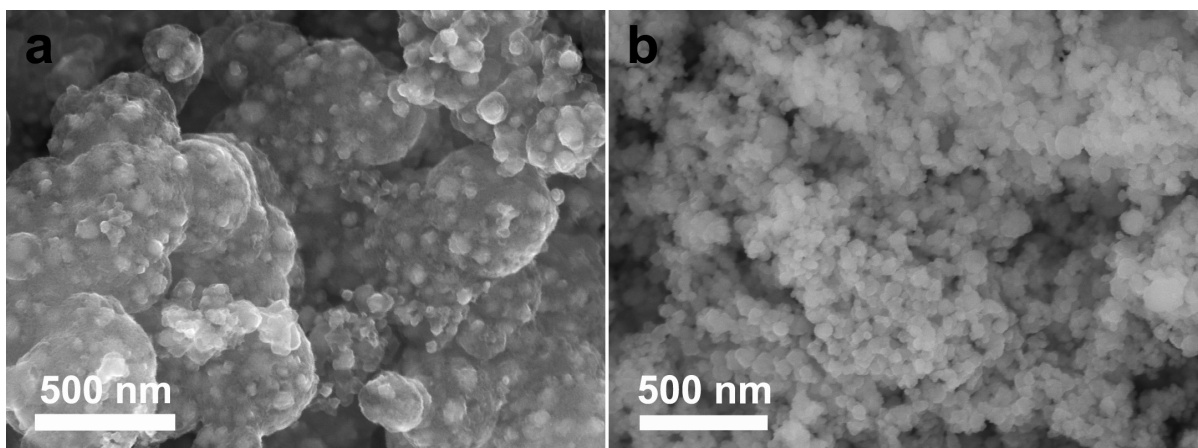

**Figure S5.** SEM images of (a) Co/N-C-800-250 and (b) Co/N-C-800-450.

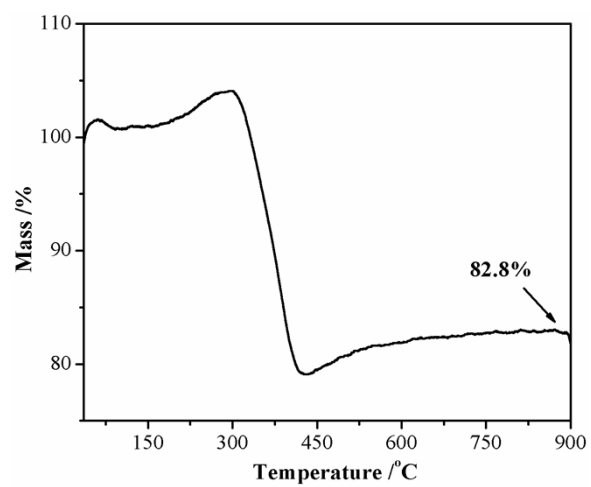

**Figure S6.** TG analysis of Co/N-C-800.

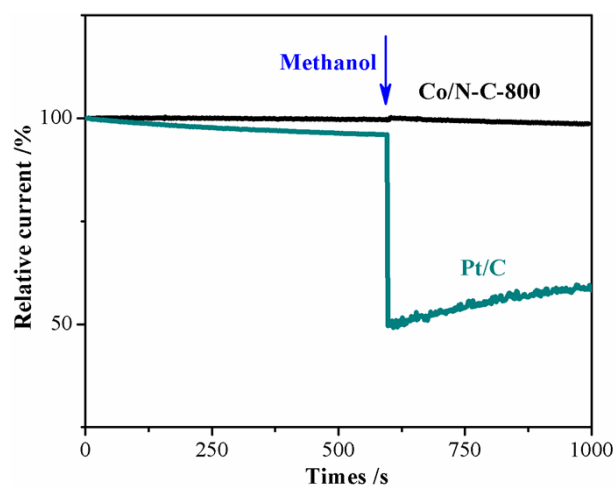

**Figure S7.** I-t plots of Co/N-C-800 and Pt/C at 0.55 V (vs. RHE) with a rotation rate of 900 rpm in O<sub>2</sub>-saturated 0.1 M KOH with the adding of methanol (1.0 M).

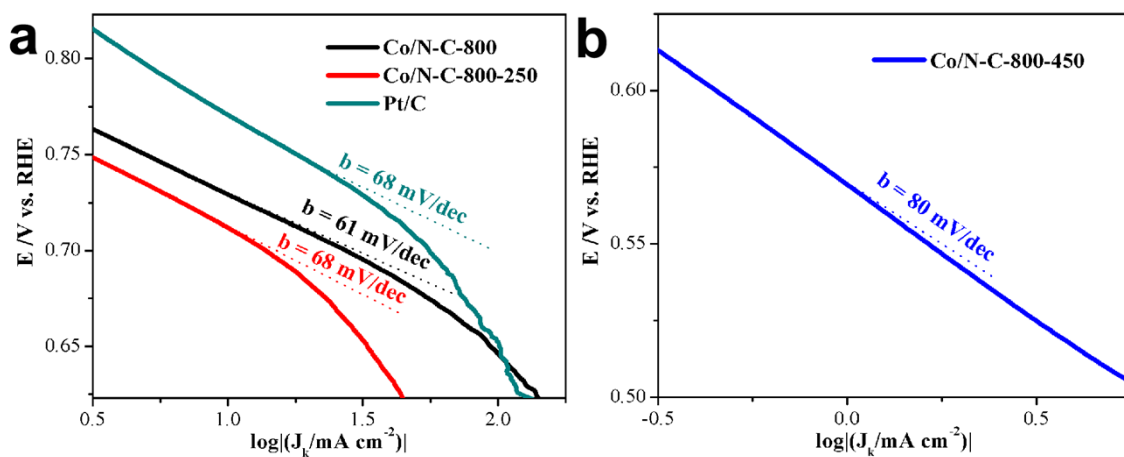

**Figure S8.** Tafel plots obtained from the RDE measurements at 1600 rpm for (a) Co/N-C-800, Co/N-C-800-250 and Pt/C, and (b) Co/N-C-800-450.

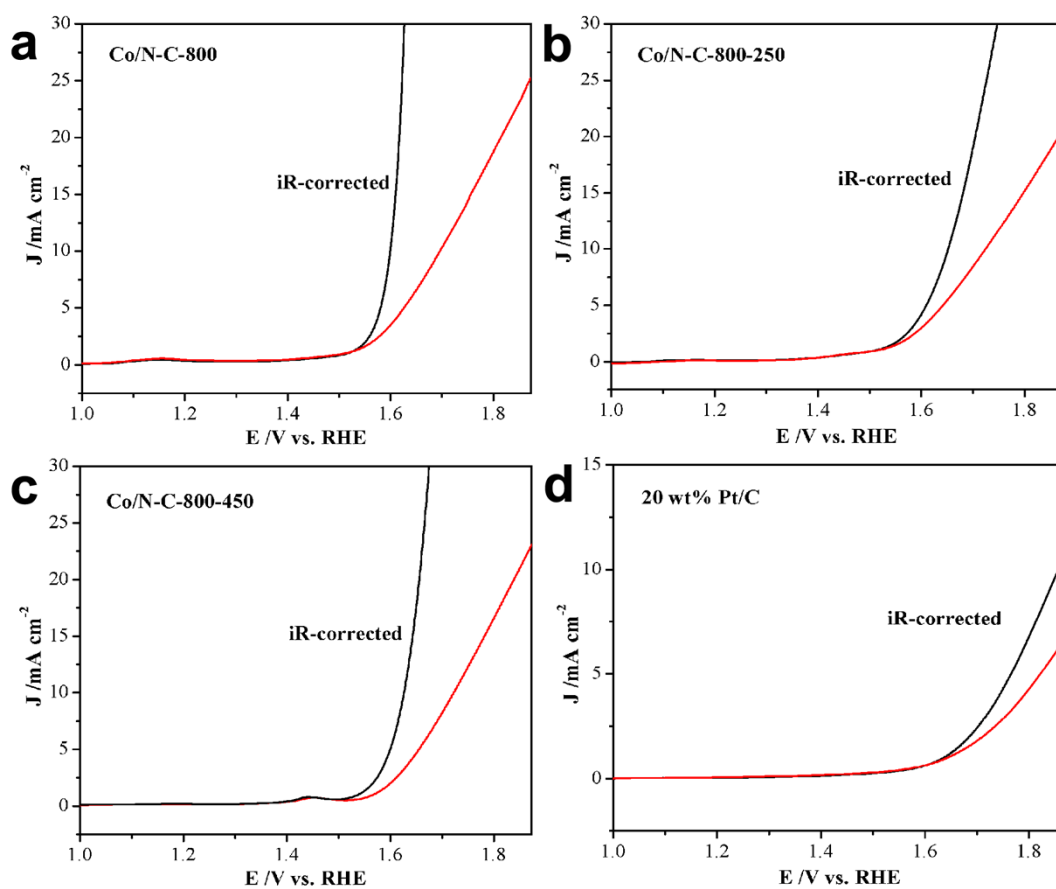

**Figure S9.** OER polarization curves for modified GC electrodes comprising the (a) Co/N-C-800, (b) Co/N-C-800-250, (c) Co/N-C-800-450, and (d) 20 wt% Pt/C with (black) and without (red) correction for iR losses. The ionic resistance ( $\sim 45 \Omega$ ) from the solution was determined by the EIS technique.

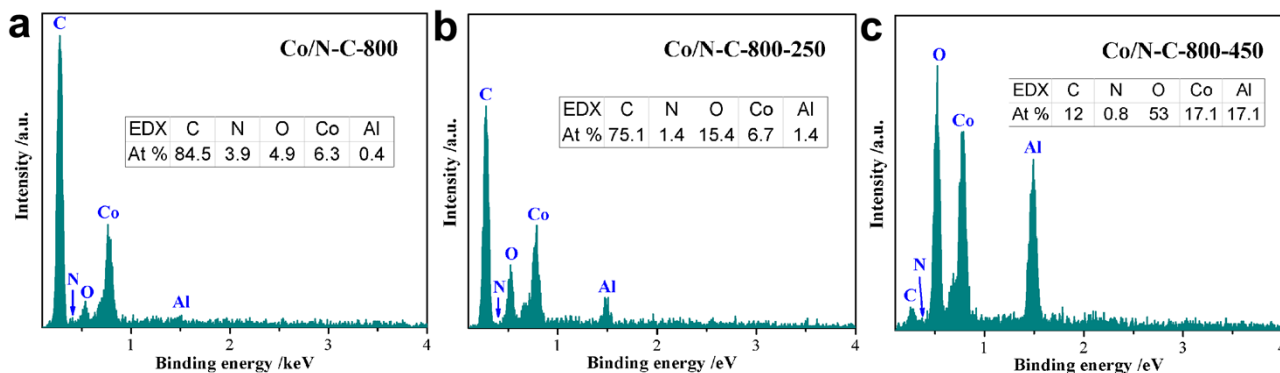

**Figure S10.** EDX spectra and the content of C, N, Co and O in (a) Co/N-C-800, (b) Co/N-C-800-250 and (c) Co/N-C-800-450, the signal of Al is from the Al substrates.

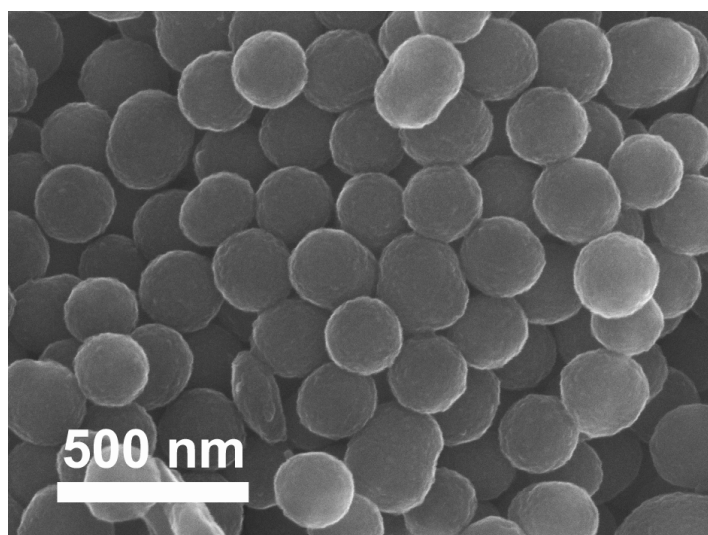

**Figure S11.** SEM image of N-doped carbon.

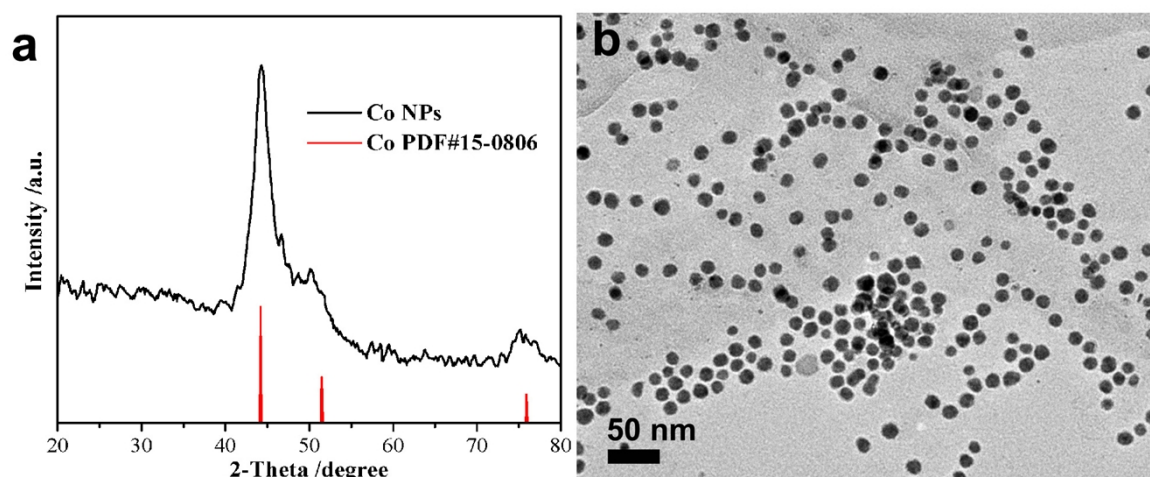

**Figure S12.** (a) XRD pattern and (b) TEM image of pristine Co NPs.

**Table S1.** Elemental composition by XPS (at %).

| Sample     | C 1s | N 1s | O 1s | Co 2p |
|------------|------|------|------|-------|
| Co/N-C-800 | 88.5 | 2.7  | 6.3  | 2.5   |

**Table S2.** Comparison of bifunctional oxygen electrode activities of Co/N-C-800 with various precious metal and non-precious metal catalysts in previous literatures.

| Catalysts                                                           | $E_{\text{ORR}}$ (V) at $J = -3 \text{ mA cm}^{-2}$ | $E_{\text{OER}}$ (V) at $J = 10 \text{ mA cm}^{-2}$ | Oxygen electrode $\Delta E$ (V) = $E_{\text{OER}} - E_{\text{ORR}}$ | Refs.                        |
|---------------------------------------------------------------------|-----------------------------------------------------|-----------------------------------------------------|---------------------------------------------------------------------|------------------------------|
| Co/N-C-800                                                          | 0.74                                                | 1.60                                                | 0.86                                                                | In this study <sup>[a]</sup> |
| 20 wt% Ir/C                                                         | 0.69                                                | 1.61                                                | 0.92                                                                | [1]                          |
| 20 wt% Ru/C                                                         | 0.61                                                | 1.62                                                | 1.01                                                                | [1]                          |
| 20 wt% Pt/C                                                         | 0.86                                                | 2.02                                                | 1.16                                                                | [1]                          |
| Mn-oxide                                                            | 0.73                                                | 1.77                                                | 1.04                                                                | [1]                          |
| LaNiO <sub>3</sub> /NC                                              | 0.64                                                | 1.66                                                | 1.02                                                                | [2]                          |
| NiCo <sub>2</sub> S <sub>4</sub> @N/S-rGO                           | 0.76                                                | 1.70                                                | 0.94                                                                | [3]                          |
| Co <sub>3</sub> O <sub>4</sub> /2.7Co <sub>2</sub> MnO <sub>4</sub> | 0.68                                                | 1.77                                                | 1.09                                                                | [4]                          |
| NiCo <sub>2</sub> O <sub>4</sub> /G                                 | 0.54                                                | 1.67                                                | 1.13                                                                | [5]                          |
| NiCo <sub>2</sub> O <sub>4</sub>                                    | 0.75                                                | 1.72                                                | 0.97                                                                | [6]                          |
| NCO-N <sub>1</sub>                                                  | 0.72                                                | 1.64                                                | 0.92                                                                | [7]                          |
| NCO-N <sub>2</sub>                                                  | 0.76                                                | 1.62                                                | 0.86                                                                | [7]                          |
| NCO-A <sub>1</sub>                                                  | 0.78                                                | 1.62                                                | 0.84                                                                | [7]                          |

<sup>[a]</sup> Here all the potential values from this study and the references were converted to vs. RHE for comparison.



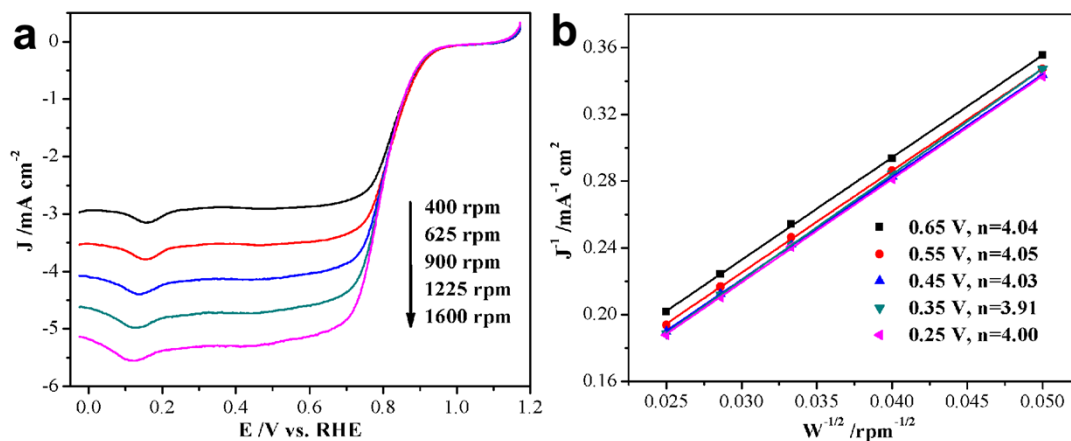

**Figure S13.** (a) Linear sweep voltammograms and (b) K-L plots at different potentials for Pt/C catalyst in O<sub>2</sub>-saturated 0.1 M KOH solution.

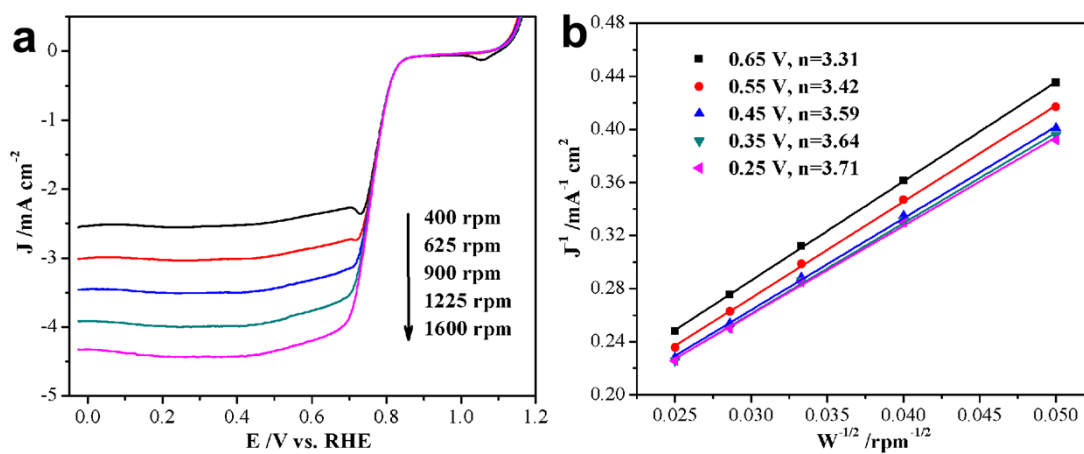

**Figure S14.** (a) Linear sweep voltammograms and (b) K-L plots at different potentials for Co/N-C-700 in O<sub>2</sub>-saturated 0.1 M KOH solution.

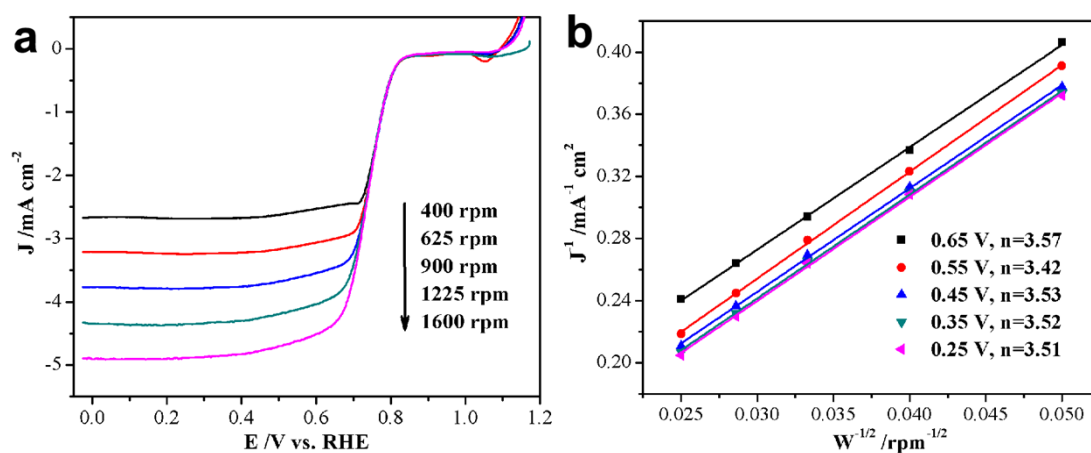

**Figure S15.** (a) Linear sweep voltammograms and (b) K-L plots at different potentials for Co/N-C-900 in O<sub>2</sub>-saturated 0.1 M KOH solution.

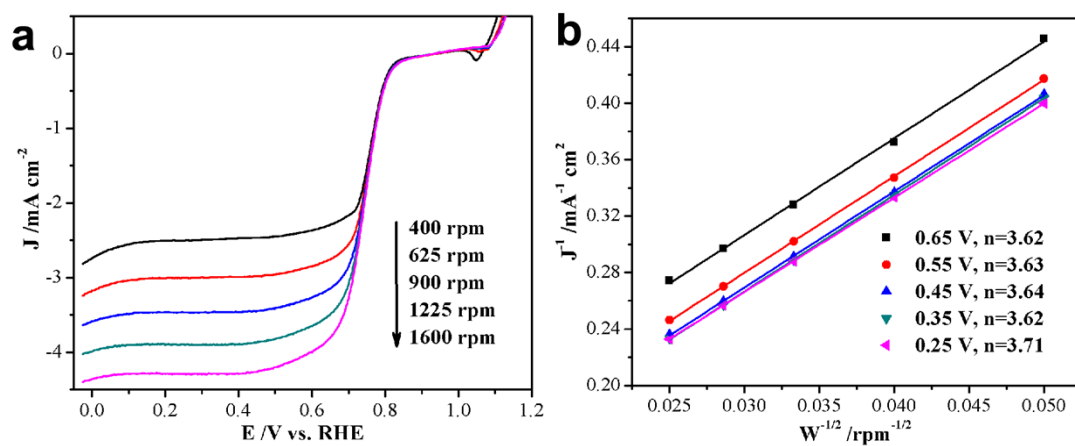

**Figure S16.** (a) Linear sweep voltammograms and (b) K-L plots at different potentials for Co/N-C-800-250 in O<sub>2</sub>-saturated 0.1 M KOH solution.

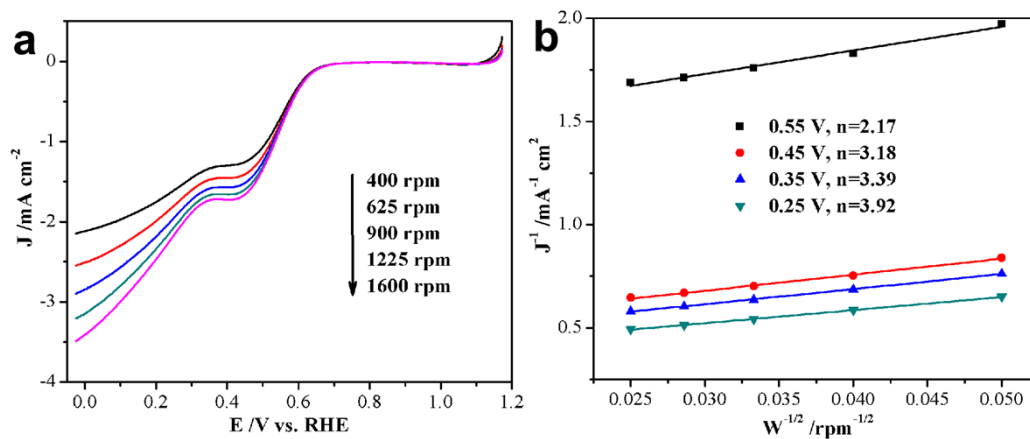

**Figure S17.** (a) Linear sweep voltammograms and (b) K-L plots at different potentials for Co/N-C-800-450 in O<sub>2</sub>-saturated 0.1 M KOH solution.

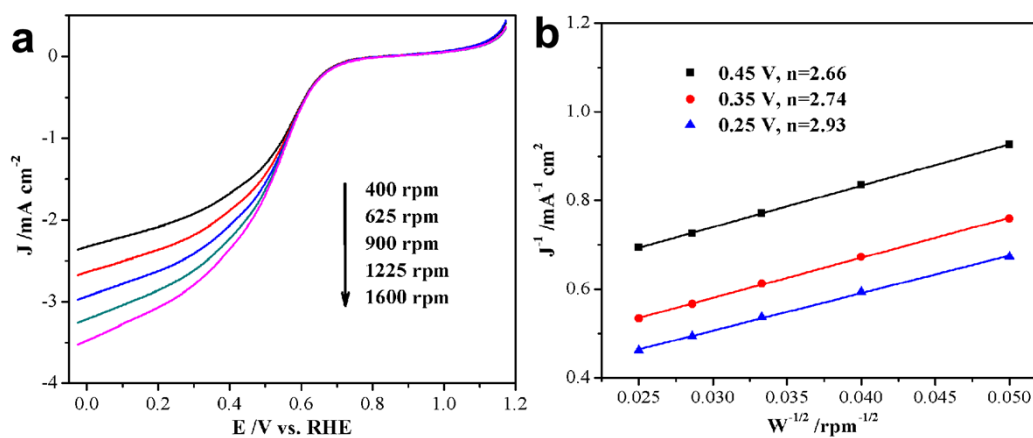

**Figure S18.** (a) Linear sweep voltammograms and (b) K-L plots at different potentials for N-doped carbon in O<sub>2</sub>-saturated 0.1 M KOH solution.

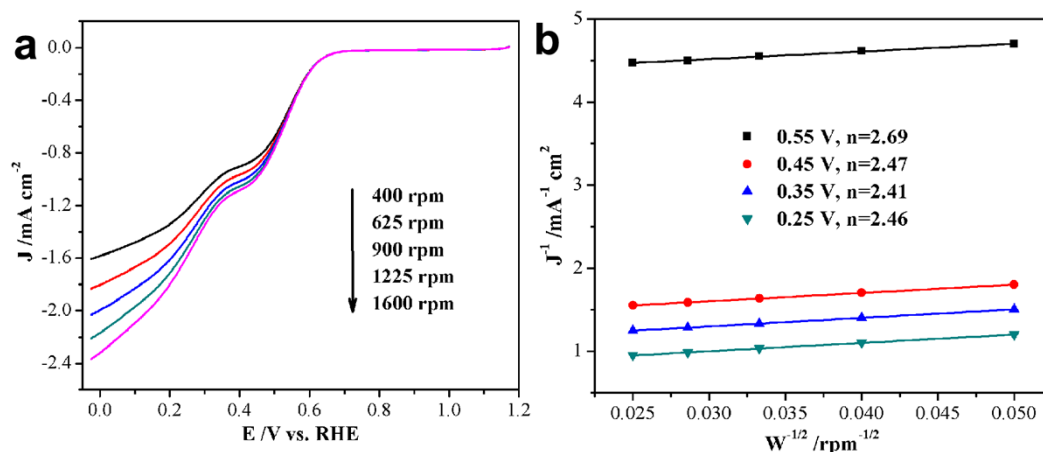

**Figure S19.** (a) Linear sweep voltammograms and (b) K-L plots at different potentials for pristine Co NPs in  $O_2$ -saturated 0.1 M KOH solution.

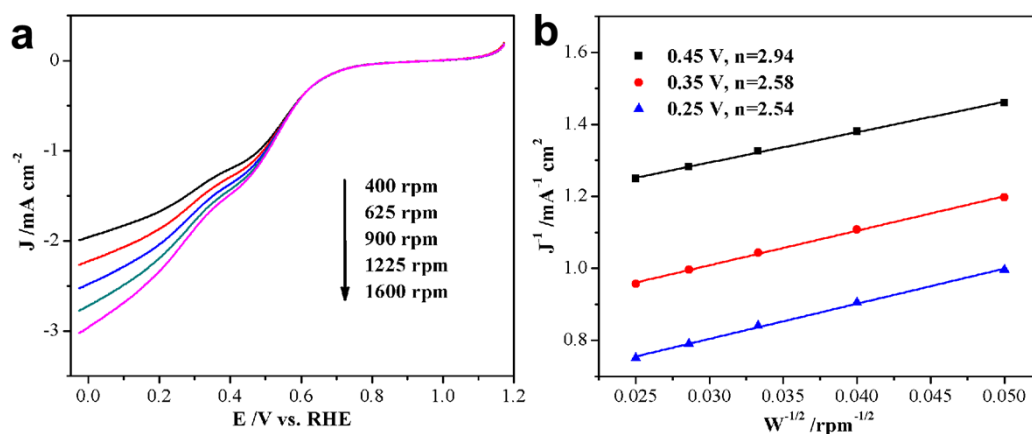

**Figure S20.** (a) Linear sweep voltammograms and (b) K-L plots at different potentials for the physical mixture of N-doped carbon and Co NPs in  $O_2$ -saturated 0.1 M KOH solution.

## References:

- [1] Y. Gorlin and T. F. Jaramillo, *J. Am. Chem. Soc.*, 2010, **132**, 13612-13614.
- [2] W. G. Hardin, D. A. Slanac, X. Wang, S. Dai, K. P. Johnston and K. J. Stevenson, *J. Phys. Chem. Lett.*, 2013, **4**, 1254-1259.
- [3] Q. Liu, J. Jin and J. Zhang, *ACS Appl. Mater. Interfaces*, 2013, **5**, 5002-5008.
- [4] D. Wang, X. Chen, D. G. Evans and W. Yang, *Nanoscale*, 2013, **5**, 5312-5315.
- [5] D. U. Lee, B. J. Kim and Z. Chen, *J. Mater. Chem. A*, 2013, **1**, 4754-4762.
- [6] C. Jin, F. Lu, X. Cao, Z. Yang and R. Yang, *J. Mater. Chem. A*, 2013, **1**, 12170-12177.
- [7] M. Prabu, K. Ketpang and S. Shanmugam, *Nanoscale*, 2014, **6**, 3173-3181.
